# Supplementary material for: WAND: A multi-modal dataset integrating advanced MRI, MEG, and TMS for multi-scale brain analysis
Source: Springer Nature journal article supplement (doi:10.1038/s41597-024-04154-7), 2025-02-06
Supplement: MOESM1 [file 41597_2024_4154_MOESM1_ESM.pdf]

## SUPPLEMENTARY MATERIALS

### **WAND: A multi-modal dataset integrating advanced MRI, MEG, and TMS for multi-scale brain analysis**

Carolyn B McNabb<sup>1</sup>, Ian D Driver<sup>1</sup>, Vanessa Hyde<sup>1</sup>, Garin Hughes<sup>1</sup>, Hannah L Chandler<sup>1</sup>, Hannah Thomas<sup>1</sup>, Christopher Allen<sup>2</sup>, Eirini Messaritaki<sup>1</sup>, Carl J Hodgetts<sup>1,3</sup>, Craig Hedge<sup>4</sup>, Maria Engel<sup>1</sup>, Sophie F Standen<sup>1</sup>, Emma L Morgan<sup>1</sup>, Elena Stylianopoulou<sup>1</sup>, Svetla Manolova<sup>1</sup>, Lucie Reed<sup>1</sup>, Mark Drakesmith<sup>1</sup>, Michael Germuska<sup>5</sup>, Alexander D Shaw<sup>6</sup>, Lars Mueller<sup>7</sup>, Holly Rossiter<sup>1</sup>, Christopher W Davies-Jenkins<sup>8,9</sup>, Tom Lancaster<sup>10</sup>, C John Evans<sup>1</sup>, David Owen<sup>1</sup>, Gavin Perry<sup>1</sup>, Slawomir Kusmia<sup>1,11</sup>, Emily Lambe<sup>1</sup>, Adam M Partridge<sup>1,12</sup>, Allison Cooper<sup>1</sup>, Peter Hobden<sup>1</sup>, Hanzhang Lu<sup>8,9</sup>, Kim S Graham<sup>1,13</sup>, Andrew D Lawrence<sup>1,13</sup>, Richard G Wise<sup>1,14,15</sup>, James T R Walters<sup>16</sup>, Petroc Sumner<sup>1</sup>, Krish D Singh<sup>1</sup>, and Derek K Jones<sup>1</sup>

<sup>1</sup>Cardiff University Brain Research Imaging Centre, School of Psychology, Cardiff University, Cardiff, United Kingdom,

<sup>2</sup>Department of Psychology, Durham University, Durham, United Kingdom,

<sup>3</sup>Department of Psychology, Royal Holloway, University of London, Egham, United Kingdom,

<sup>4</sup>School of Psychology, Aston University, Birmingham, United Kingdom,

<sup>5</sup> Department of Radiology, University of California Davis Medical Center, Sacramento, California, USA,

<sup>6</sup>Washington Singer Laboratories, University of Exeter, Exeter, United Kingdom,

<sup>7</sup>Leeds Institute of Cardiovascular and Metabolic Medicine, University of Leeds, Leeds, United Kingdom,

<sup>8</sup>The Russell H. Morgan Department of Radiology and Radiological Science, Johns Hopkins University School of Medicine, Baltimore, Maryland, USA,

<sup>9</sup>F.M. Kirby Research Center for Functional Brain Imaging, Kennedy Krieger Institute, Baltimore, Maryland, USA,

<sup>10</sup>Department of Psychology, University of Bath, Bath, United Kingdom,

<sup>11</sup>IBM Polska Sp. z o. o., Department of Content Design, Cracow, Poland

<sup>12</sup>University of Sheffield, Research Services, New Spring House, 231 Glossop Road, Sheffield, S10 2GW, UK

<sup>13</sup>School of Philosophy, Psychology and Language Sciences, Dugald Stewart Building, University of Edinburgh, 3 Charles Street, Edinburgh, EH8 9AD, UK

<sup>14</sup>Department of Neurosciences, Imaging, and Clinical Sciences, 'G. D'Annunzio' University of Chieti-Pescara, Chieti, Italy,

<sup>15</sup>Institute for Advanced Biomedical Technologies, 'G. D'Annunzio' University of Chieti-Pescara, Chieti, Italy

<sup>16</sup>School of Medicine, Centre for Neuropsychiatric Genetics and Genomics, Cardiff University, Cardiff, United Kingdom

## TABLE OF CONTENTS

|                                                                                                                                                                                                                                                                                                                                                                                                                                                                                                                                                                                                                                                                                                                                                                                  |    |
|----------------------------------------------------------------------------------------------------------------------------------------------------------------------------------------------------------------------------------------------------------------------------------------------------------------------------------------------------------------------------------------------------------------------------------------------------------------------------------------------------------------------------------------------------------------------------------------------------------------------------------------------------------------------------------------------------------------------------------------------------------------------------------|----|
| Table S1. Reasons for exclusion from the Welsh Advanced Neuroimaging Database .....                                                                                                                                                                                                                                                                                                                                                                                                                                                                                                                                                                                                                                                                                              | 3  |
| Table S2. Imaging data acquired as part of the Welsh Advanced Neuroimaging Database. Session numbers and data type are provided to assist researchers in locating the data in the public repository and have been organised using the Brain Imaging Data Structure (BIDS). Abbreviations: MPRAGE - Magnetization Prepared Rapid Gradient Echo; BOLD – blood oxygen level dependent; EPI – echo planar imaging; pCASL – Pseudo-continuous arterial spin labelling; semi-LASER - semi-localization by adiabatic selective refocusing; MEGA-PRESS - Meshcher-Garwood Point RESolved Spectroscopy; TRUST - T2 relaxation under spin tagging.....                                                                                                                                     | 5  |
| Table S3. Summary of MRI parameters for each acquisition sequence. Abbreviations: TR – repetition time; TE – echo time; FOV – field of view; TI – inversion time; A>>P – anterior to posterior; MPRAGE - Magnetization Prepared Rapid Gradient Echo; BOLD – blood oxygen level dependent; EPI – echo planar imaging; SPGR - spoiled gradient-recalled echo sequence; SPGR-IR - inversion recovery-prepped spoiled gradient-recalled echo sequence; SSFP - steady-state free precession; pCASL – Pseudo-continuous arterial spin labelling; semi-LASER - semi-localization by adiabatic selective refocusing; MEGA-PRESS - Meshcher-Garwood Point RESolved Spectroscopy; TRUST - T2 relaxation under spin tagging; MP2RAGE - magnetization prepared 2 rapid gradient echoes. .... | 7  |
| Table S4. Cognitive tasks and questionnaires included in the Welsh Advanced Neuroimaging Database. Abbreviations: UPPS-P - Urgency-Premeditation-Perseverance-Sensation Seeking-Positive Urgency .....                                                                                                                                                                                                                                                                                                                                                                                                                                                                                                                                                                           | 12 |
| Table S5. Summary statistics for questionnaire data included in the Welsh Advanced Neuroimaging Database. ....                                                                                                                                                                                                                                                                                                                                                                                                                                                                                                                                                                                                                                                                   | 13 |
| Table S6. Summary statistics for cognitive tasks included in the Welsh Advanced Neuroimaging Database. ....                                                                                                                                                                                                                                                                                                                                                                                                                                                                                                                                                                                                                                                                      | 16 |

*Table S1. Reasons for exclusion from the Welsh Advanced Neuroimaging Database*

| <b>Reason for exclusion</b>    | <b>Number of people excluded</b> |
|--------------------------------|----------------------------------|
| depression                     | 71                               |
| time                           | 51                               |
| not MRI compatible             | 49                               |
| did not specify                | 48                               |
| medication                     | 45                               |
| migraines                      | 32                               |
| tattoo location                | 32                               |
| psychiatric diagnosis          | 23                               |
| concussion                     | 22                               |
| location                       | 21                               |
| anxiety disorder               | 16                               |
| diabetes                       | 11                               |
| claustrophobia                 | 10                               |
| copper IUD                     | 8                                |
| pregnancy/breastfeeding        | 7                                |
| age                            | 6                                |
| neurological - did not specify | 6                                |
| regular smoker                 | 6                                |
| ADHD                           | 5                                |
| pain killers                   | 5                                |
| stroke                         | 5                                |
| rheumatoid arthritis           | 4                                |
| PTSD                           | 3                                |
| titanium plates                | 3                                |
| bipolar                        | 2                                |
| brain tumour                   | 2                                |
| drug use                       | 2                                |
| haemorrhage                    | 2                                |
| HIV                            | 2                                |
| Interest                       | 2                                |
| metal in body                  | 2                                |
| multiple sclerosis             | 2                                |
| traumatic brain injury         | 2                                |
| ADHD and Anxiety Disorder      | 1                                |
| aneurysm                       | 1                                |
| anorexia                       | 1                                |
| Asthma                         | 1                                |
| autism                         | 1                                |
| cancer                         | 1                                |
| carpal tunnel syndrome         | 1                                |

---

|                             |   |
|-----------------------------|---|
| charcot marie tooth disease | 1 |
| chiara I malformation       | 1 |
| epilepsy                    | 1 |
| family history              | 1 |
| hernia mesh                 | 1 |
| high blood pressure         | 1 |
| hydrocephalus               | 1 |
| illness                     | 1 |
| long-term illness           | 1 |
| narcolepsy                  | 1 |
| other                       | 1 |
| pacemaker                   | 1 |
| panic disorder              | 1 |
| parkinson's disease         | 1 |
| restless leg syndrome       | 1 |
| sterilisation               | 1 |
| tourettes                   | 1 |

---

*Table S2. Imaging data acquired as part of the Welsh Advanced Neuroimaging Database. Session numbers and data type are provided to assist researchers in locating the data in the public repository and have been organised using the Brain Imaging Data Structure (BIDS). Abbreviations: MPRAGE - Magnetization Prepared Rapid Gradient Echo; BOLD – blood oxygen level dependent; EPI – echo planar imaging; pCASL – Pseudo-continuous arterial spin labelling; semi-LASER - semi-localization by adiabatic selective refocusing; MEGA-PRESS - Meshcher-Garwood Point RESolved Spectroscopy; TRUST - T2 relaxation under spin tagging.*

| Session                                                     | Data type | Acquisition sequence                                                | Functional task                                | File naming pattern                |
|-------------------------------------------------------------|-----------|---------------------------------------------------------------------|------------------------------------------------|------------------------------------|
| <b>Magnetoencephalography (MEG; ses-01)</b>                 | meg       |                                                                     | Rest                                           | *task-resting                      |
|                                                             | meg       |                                                                     | Visual Gamma                                   | *task-visual                       |
|                                                             | meg       |                                                                     | Simon Task                                     | *task-simon                        |
|                                                             | meg       |                                                                     | 40Hz auditory stimulus / finger abduction task | *task-auditorymotor                |
|                                                             | meg       |                                                                     | Mismatch negativity                            | *task-mmn                          |
| <b>Diffusion and quantitative 3T MRI (300 mT/m; ses-02)</b> | anat      | T1-weighted structural image (MPRAGE)                               |                                                | *T1w                               |
|                                                             | dwi       | Multi-shell high angular resolution diffusion imaging               |                                                | *acq-CHARMED_dir*_dwi              |
|                                                             | dwi       | Diffusion-weighted imaging with variable diffusion time             |                                                | *acq-AxCatiber_dir*_dwi            |
|                                                             | anat      | Quantitative magnetisation transfer imaging                         |                                                | *QMT                               |
|                                                             | anat      | Spoiled and unspoiled gradient echoes                               |                                                | *VFA                               |
| <b>3T functional and perfusion MRI (ses-03)</b>             | anat      | T1-weighted structural image (MPRAGE)                               |                                                | *T1w                               |
|                                                             | anat      | T2-weighted turbo spin echo                                         |                                                | *rec-nlgradcorr_T2w                |
|                                                             | func      | Blood oxygen level dependent echo planar imaging (BOLD EPI)         | Category localiser task                        | *task-categorylocaliser_run*_bold  |
|                                                             | func      | BOLD EPI                                                            | Reversal learning task                         | *task-reversallearning_bold        |
|                                                             | func      | BOLD EPI                                                            | Rest                                           | *task-rest_bold                    |
|                                                             | perf      | Pseudo-continuous arterial spin labelling (pCASL)                   |                                                | *acq-PCASL_cbf                     |
|                                                             | perf      | T2-relaxation-under-spin-tagging (TRUST) – venous blood oxygenation |                                                | *acq-TRUST_cbf                     |
|                                                             | perf      | T1 inversion recovery – haemoglobin                                 |                                                | *acq-InvRec_cbf                    |
| <b>7T Magnetic resonance spectroscopy (MRS; ses-04)</b>     | anat      | T1-weighted structural image (MPRAGE)                               |                                                | *T1w                               |
|                                                             | mrs       | semi-LASER – left sensorimotor (metabolite and water reference)     |                                                | *acq-slaser_voi-smleft*            |
|                                                             | mrs       | semi-LASER – anterior cingulate (metabolite and water reference)    |                                                | *acq-slaser_voi-anteriorcingulate* |
|                                                             | mrs       | semi-LASER – occipital (metabolite and water reference)             |                                                | *acq-slaser_voi-occipital*         |
|                                                             | mrs       | semi-LASER – right auditory (metabolite and water reference)        |                                                | *acq-slaser_voi-rightauditory*     |
|                                                             | anat      | T1-weighted structural image (MPRAGE)                               |                                                | *T1w                               |

|                                                         |      |                                                                          |                                                   |                                       |
|---------------------------------------------------------|------|--------------------------------------------------------------------------|---------------------------------------------------|---------------------------------------|
| <b>3T Magnetic resonance spectroscopy (MRS; ses-05)</b> | mrs  | MEGA-PRESS – left sensorimotor (metabolite and water reference)          |                                                   | *acq-mega_voi-smleft*                 |
|                                                         | mrs  | MEGA-PRESS – anterior cingulate (metabolite and water reference)         |                                                   | *acq-mega_voi-anteriorcingulate*      |
|                                                         | mrs  | MEGA-PRESS – occipital (metabolite and water reference)                  |                                                   | *acq-mega_voi-occipital*              |
|                                                         | mrs  | MEGA-PRESS – right auditory (metabolite and water reference)             |                                                   | *acq-mega_voi-rightauditory*          |
| <b>7T structural/functional MRI (ses-06)</b>            | anat | T1-weighted structural image (MP2RAGE)                                   |                                                   | *MP2RAGE                              |
|                                                         | anat | T2-weighted turbo spin echo (slices orthogonal to hippocampal long axis) |                                                   | *T2w                                  |
|                                                         | func | BOLD EPI                                                                 | Rest                                              | *task-rest_bold                       |
|                                                         | anat | Multi-echo gradient echo (mGRE)                                          |                                                   | *MEGRE                                |
| <b>3T metabolic MRI (ses-07)</b>                        | perf | TRUST – venous blood oxygenation                                         |                                                   | *TRUST_cbf                            |
|                                                         | perf | T1 inversion recovery – haemoglobin                                      |                                                   | *acq-InvRec_cbf                       |
|                                                         | perf | Dual-excitation pCASL                                                    | Breath-hold                                       | *acq-PCASL-task-breathhold_cbf        |
|                                                         | anat | Single-echo gradient echo (GRE)                                          |                                                   | *T2starw                              |
|                                                         | func | Spin echo EPI                                                            | Breath-hold                                       | *task-breathhold_bold                 |
|                                                         | perf | Dual-excitation pCASL                                                    | Rest                                              | *acq-PCASL-task-rest_cbf              |
|                                                         | perf | Dual-excitation pCASL                                                    | Breath-hold + visual stimulation (checkerboard)   | *acq-PCASL-task-breathholdchecker_cbf |
| <b>Transcranial magnetic stimulation (ses-08)</b>       | tms  |                                                                          | Short and Long Interval Intra Cortical Inhibition | *SiCIdatam                            |

*Table S3. Summary of MRI parameters for each acquisition sequence. Abbreviations: TR – repetition time; TE – echo time; FOV – field of view; TI – inversion time; A>>P – anterior to posterior; MPRAGE - Magnetization Prepared Rapid Gradient Echo; BOLD – blood oxygen level dependent; EPI – echo planar imaging; SPGR - spoiled gradient-recalled echo sequence; SPGR-IR - inversion recovery-prepped spoiled gradient-recalled echo sequence; SSFP - steady-state free precession; pCASL – Pseudo-continuous arterial spin labelling; semi-LASER - semi-localization by adiabatic selective refocusing; MEGA-PRESS - Meshcher-Garwood Point RESolved Spectroscopy; TRUST - T2 relaxation under spin tagging; MP2RAGE - magnetization prepared 2 rapid gradient echoes.*

| <b>Session</b>                                              | <b>Acquisition</b>                                      | <b>Parameters</b>                                                                                                                                                                                                                                                                                                           |
|-------------------------------------------------------------|---------------------------------------------------------|-----------------------------------------------------------------------------------------------------------------------------------------------------------------------------------------------------------------------------------------------------------------------------------------------------------------------------|
| <b>Diffusion and quantitative 3T MRI (300 mT/m; ses-02)</b> | T1-weighted anatomical                                  | TR: 2300 ms<br>TE: 2 ms<br>Flip Angle: 9°<br>FOV: 256 x 256 x 192 mm <sup>3</sup><br>Voxel Size: 1 x 1 x 1 mm <sup>3</sup><br>TI: 857 ms<br>Phase-encoding: A>>P                                                                                                                                                            |
|                                                             | Multi-shell diffusion-weighted MRI                      | TR: 3000 ms<br>TE: 59 ms<br>FOV: 220 x 220 x 132 mm <sup>3</sup><br>Voxel Size: 2 x 2 x 2 mm <sup>3</sup><br>Phase-encoding: A>>P and P>>A<br>Diffusion gradient: $\delta = 7$ ms, $\Delta = 24$ ms<br>b-values: b=200, 500, 1200, 2400, 4000, 6000 s/mm <sup>2</sup> )                                                     |
|                                                             | Diffusion-weighted imaging with variable diffusion time | TR: 3900 ms<br>TE: 80 ms<br>FOV: 220 x 220 x 132 mm <sup>3</sup><br>Voxel Size: 2 x 2 x 2 mm <sup>3</sup><br>Phase-encoding: A>>P and P>>A<br>Diffusion gradient: $\delta = 7$ ms<br>$\Delta$ and b-values: Multiple ( $\Delta = 18, 30, 42, 55$ ms with various b-value pairs up to b = 7750 and 15500 s/mm <sup>2</sup> ) |
|                                                             | Spoiled and unspoiled gradient echo                     | SPGR: TR 4 ms, TE 1.9 ms, 8 flip angles (3 - 18°)<br>SPGRIR: TR 4 ms, TE 1.9 ms, flip angle 5°<br>SSFP: TR 4.54 ms, TE 2.27 ms, 8 flip angles (10 - 60°)<br>FOV: 220 x 220 x 179 mm <sup>3</sup><br>Voxel Size: 1.72 x 1.72 x 1.72 mm <sup>3</sup><br>Phase-encoding: A>>P                                                  |
|                                                             | Quantitative magnetization transfer (qMT)               | TR: 55 ms<br>TE: 2.1 ms<br>FOV: 220 x 220 x 179 mm <sup>3</sup><br>Voxel Size: 1.72 x 1.72 x 1.72 mm <sup>3</sup><br>MT-weighted images: 11 combinations of flip angle/offset<br>Phase-encoding: A>>P<br>Turbo factor: 4                                                                                                    |
| <b>3T functional and perfusion MRI (ses-03)</b>             | T1-weighted anatomical                                  | TR: 2250 ms<br>TE: 3.06 ms<br>Flip Angle: 9°                                                                                                                                                                                                                                                                                |

FOV: 256 x 288 x 176 mm<sup>3</sup>  
 Voxel Size: 1 x 1 x 1 mm<sup>3</sup>  
 TI: 850 ms  
 Phase-encoding: A>>P

|                                                         |                                                                                                                                                                                                              |
|---------------------------------------------------------|--------------------------------------------------------------------------------------------------------------------------------------------------------------------------------------------------------------|
| T2-weighted anatomical                                  | TR: 8000 ms<br>TE: 82 ms<br>Echo train length: 17<br>Echo spacing: 8.22 ms<br>Flip Angle: 120°<br>FOV: 256 x 256 mm <sup>2</sup><br>Voxel Size: 1 x 1 mm <sup>2</sup><br>Slices: 88 (2 mm thick, contiguous) |
| BOLD fMRI (task-based and resting-state)                | TR: 2000 ms<br>TE: 30 ms<br>Flip Angle: 70°<br>FOV: 192 x 192 x 160 mm <sup>3</sup><br>Voxel Size: 2.0 x 2.0 x 2.0 mm <sup>3</sup><br>Phase-encoding: A>>P<br>Multiband Acceleration Factor: 4               |
| Pseudocontinuous arterial spin labelling (pCASL)        | TR: 4600 ms<br>TE: 11 ms<br>Post label delay: 2000 ms<br>Tag duration: 1800 ms<br>FOV: 320 x 320 mm <sup>2</sup><br>Voxel Size: 3.4 x 3.4 x 5.0 mm <sup>3</sup><br>Slices: 22 (5 mm thick)                   |
| T2 Relaxation under Spin Tagging (TRUST)                | TR: 3000 ms<br>TE: 3.9 ms<br>Effective echo times: 0, 40, 80, 160 ms<br>FOV: 220 x 220 mm <sup>2</sup><br>Voxel Size: 3.4 x 3.4 x 5.0 mm <sup>3</sup>                                                        |
| T1 Inversion Recovery                                   | TR and ΔTR: 150 ms<br>TE: 22 ms<br>Post label delay: 1800 ms<br>Flip Angle: 90°<br>FOV: 240 x 240 mm <sup>2</sup><br>Voxel Size: 3.4 x 3.4 x 5.0 mm <sup>3</sup><br>Slices: 1 (3 mm thick)                   |
| Gradient Echo Field Maps                                | TR: 434 ms<br>TE1: 4.92 ms<br>TE2: 7.38 ms<br>Flip Angle: 60°<br>FOV: 96 x 96 mm <sup>2</sup><br>Voxel Size: 2.0 x 2.0 x 6.0 mm <sup>3</sup>                                                                 |
| <b>7T Magnetic resonance spectroscopy (MRS; ses-04)</b> | B1 Inhomogeneity Map<br>TR: 5000 ms<br>TE1: 0.9 ms<br>TE2: 1.55 ms<br>Flip Angle1: 60°<br>FOV: 200 x 200 x 200 mm <sup>3</sup><br>Voxel Size: 4.5 x 4.5 x 4.5 mm <sup>3</sup>                                |



Phase encoding direction: R>>L

---

|                                                         |                                                       |                                                                                                                                                                                                                                |
|---------------------------------------------------------|-------------------------------------------------------|--------------------------------------------------------------------------------------------------------------------------------------------------------------------------------------------------------------------------------|
|                                                         | T1-weighted anatomical                                | TR: 2200 ms<br>TE: 3.02 ms<br>Flip Angle: 7°<br>FOV: 224 x 224 x 157 mm <sup>3</sup><br>Voxel Size: 0.7 x 0.7 x 0.7 mm <sup>3</sup><br>TI: 1050 ms                                                                             |
|                                                         | Metabolite and water reference data (semi-LASER)      | TR: 5230 ms<br>TE: 78 ms<br>Voxel Size: Various VOIs (30 x 30 x 30 mm <sup>3</sup> , 25 x 30 x 40 mm <sup>3</sup> )<br>Frequency offset: 1.7 ppm for metabolites, 0 ppm for water<br>Spectral width: 3000 Hz                   |
| <b>3T Magnetic resonance spectroscopy (MRS; ses-05)</b> | T1-weighted anatomical                                | TR: 2250 ms<br>TE: 3.06 ms<br>Flip Angle: 9°<br>FOV: 256 x 288 x 176 mm <sup>3</sup><br>Voxel Size: 1 x 1 x 1 mm <sup>3</sup><br>TI: 850 ms                                                                                    |
|                                                         | GABA-edited MRS and water reference data (MEGA-PRESS) | TR: 2000 ms<br>TE: 68 ms<br>Voxel Size: Various VOIs (30 x 30 x 30 mm <sup>3</sup> , 25 x 30 x 40 mm <sup>3</sup> )<br>Frequency offset: 1.7 ppm for metabolites, 0 ppm for water<br>Spectral width: 2000 Hz                   |
| <b>7T structural/functional MRI (ses-06)</b>            | B1 Inhomogeneity Map                                  | TR: 5000 ms<br>TE1: 0.9 ms<br>TE2: 1.55 ms<br>Flip Angles: 60°, 8°, 3°<br>FOV: 200 x 200 x 200 mm <sup>3</sup><br>Voxel Size: 4.5 x 4.5 x 4.5 mm <sup>3</sup><br>Phase-encoding: R>>L                                          |
|                                                         | T1-weighted anatomical (MP2RAGE)                      | TR: 3500 ms<br>TE: 2.64 ms<br>Flip Angles: 5° (1st), 2° (2nd)<br>FOV: 224 x 224 x 157 mm <sup>3</sup><br>Voxel Size: 0.7 x 0.7 x 0.7 mm <sup>3</sup><br>TI1: 725 ms<br>TI2: 2150 ms<br>Phase-encoding: A>>P                    |
|                                                         | T2-weighted anatomical                                | TR: 13000 ms<br>TE: 75 ms<br>Echo Spacing: 15.1 ms<br>Flip Angle: 120°<br>Echo Train Length: 9<br>FOV: 220 x 220 mm <sup>2</sup><br>Voxel Size: 0.4 x 0.4 mm <sup>2</sup><br>In-plane Interpolation: 0.2 x 0.2 mm <sup>2</sup> |

---

|                                  |                                          |                                                                                                                                                                                                                                           |
|----------------------------------|------------------------------------------|-------------------------------------------------------------------------------------------------------------------------------------------------------------------------------------------------------------------------------------------|
|                                  | Resting-state BOLD fMRI                  | TR: 1500 ms<br>TE: 25 ms<br>Flip Angle: 65°<br>Echo Spacing: 0.72 ms<br>FOV: 192 x 192 mm <sup>2</sup><br>Voxel Size: 1.5 x 1.5 x 1.5 mm <sup>3</sup><br>Multiband Acceleration factor: 4<br>Phase Encoding: A>>P                         |
|                                  | Spin Echo EPI for Distortion Correction  | TR: 2000 ms<br>TE: 45 ms<br>Phase Encoding: A>>P and P>>A                                                                                                                                                                                 |
|                                  | Multi-echo 3D Gradient Echo              | TR: 39 ms<br>Flip Angle: 11°<br>Echo Times: 7 echoes, 5 to 35 ms (5 ms increments)<br>FOV: 224 x 224 x 224 mm <sup>3</sup><br>Voxel Size: 0.67 x 0.67 x 0.67 mm <sup>3</sup><br>Slices: 192<br>Bandwidth: 290 Hz/px<br>Undersampling: 2x2 |
| <b>3T metabolic MRI (ses-07)</b> | TRUST (T2 Relaxation under Spin Tagging) | TR: 3000 ms<br>TE: 3.9 ms<br>Echo Times: 0, 40, 80, 160 ms<br>FOV: 220 x 220 mm <sup>2</sup><br>Voxel Size: 3.4 x 3.4 x 5 mm <sup>3</sup><br>TI: 1020 ms<br>Phase Partial Fourier: 6/8                                                    |
|                                  | T1 Inversion Recovery                    | TR: 150 ms<br>TE: 22 ms<br>Post Label Delay: 1800 ms<br>Flip Angle: 90°<br>FOV: 240 x 240 mm <sup>2</sup><br>Slice Thickness: 3 mm                                                                                                        |
|                                  | 3D Phase Contrast                        | TR: 40.65 ms<br>TE: 5.6 ms<br>Flip Angle: 10°<br>FOV: 180 x 240 x 78 mm <sup>3</sup><br>Voxel Size: 0.47 x 0.47 x 1.30 mm <sup>3</sup><br>Venc: 75 cm/s                                                                                   |
|                                  | Dual excitation (DEXI) pCASL             | TR: 4.4 s<br>TE1: 10 ms<br>TE2: 30 ms<br>FOV: 3.4 x 3.4 mm <sup>2</sup><br>Slice Thickness: 6 mm (33% gap)<br>Task: Breath-hold and resting-state                                                                                         |
|                                  | M0 scans for CBF quantification          | TR: 6000 ms<br>TE: 10 ms<br>Flip Angle: 90°<br>Phase Encoding: A>>P and P>>A (matched with DEXI dataset)                                                                                                                                  |

Spin-echo EPI TR: 2500 ms  
TE: 90 ms  
Echo Spacing: 0.55 ms  
Voxel Size: 3.4 x 3.4 x 6.5 mm<sup>3</sup>  
Slices: 15  
Task: Breath-hold

---

Single-echo 3D Gradient Echo TR: 20 ms  
TE: 14 ms  
Flip Angle: 15°  
Voxel Size: 0.8 x 0.8 x 1.0 mm<sup>3</sup>  
FOV: 230 x 230 x 144 mm<sup>3</sup>  
Slices: 144  
Bandwidth: 220 Hz/px

---

*Table S4. Cognitive tasks and questionnaires included in the Welsh Advanced Neuroimaging Database. Abbreviations: UPPS-P - Urgency-Premeditation-Perseverance-Sensation Seeking-Positive Urgency*

| <b>Cognitive tasks</b>                         | <b>Number of Participants</b> | <b>Name of file</b>                          |
|------------------------------------------------|-------------------------------|----------------------------------------------|
| Choice reaction-time tasks                     | 174                           | TwoChoice.tsv; FourChoice.tsv                |
| Logical memory task                            | 178                           | cog_tasks.tsv                                |
| Vocabulary test                                | 178                           | cog_tasks.tsv                                |
| Matrix reasoning (WASI-II)                     | 178                           | cog_tasks.tsv                                |
| Verbal fluency test                            | 178                           | cog_tasks.tsv                                |
| Balloon analogue risk task                     | 173                           | BART.tsv                                     |
| <b>Participant demographics</b>                |                               |                                              |
| Demographic interview                          | 178                           | participants.tsv                             |
| <b>Neuropsychiatric interview</b>              |                               |                                              |
| Mini International Neuropsychiatric Interview  | 178                           | MINI.tsv                                     |
| <b>Trait questionnaires</b>                    |                               |                                              |
| Short UPPS-P Impulsive Behaviour Scale         | 160                           | questionnaires.tsv; WAND_SUBSCALE_SCORES.tsv |
| Generalized Anxiety Disorder 7-item scale      | 160                           | questionnaires.tsv; WAND_SUBSCALE_SCORES.tsv |
| Anxiety Depression Distress Inventory          | 160                           | questionnaires.tsv; WAND_SUBSCALE_SCORES.tsv |
| Global Physical Activity Questionnaire         | 160                           | questionnaires.tsv; WAND_SUBSCALE_SCORES.tsv |
| Emotion Regulation Questionnaire               | 160                           | questionnaires.tsv; WAND_SUBSCALE_SCORES.tsv |
| Big Five Inventory-2 short form                | 160                           | questionnaires.tsv; WAND_SUBSCALE_SCORES.tsv |
| Schizotypal Personality Questionnaire          | 160                           | questionnaires.tsv; WAND_SUBSCALE_SCORES.tsv |
| Single Item Need to Belong Scale               | 160                           | questionnaires.tsv; WAND_SUBSCALE_SCORES.tsv |
| Survey of Autobiographical Memory              | 160                           | questionnaires.tsv; WAND_SUBSCALE_SCORES.tsv |
| Navigational Strategies Questionnaire          | 160                           | questionnaires.tsv; WAND_SUBSCALE_SCORES.tsv |
| Mind Wandering Questionnaire                   | 160                           | questionnaires.tsv; WAND_SUBSCALE_SCORES.tsv |
| Fazio Laterality Inventory                     | 160                           | questionnaires.tsv; WAND_SUBSCALE_SCORES.tsv |
| Hospital Anxiety and Depression Scale          | 160                           | questionnaires.tsv; WAND_SUBSCALE_SCORES.tsv |
| Visual Vertigo analogue Scale                  | 160                           | questionnaires.tsv; WAND_SUBSCALE_SCORES.tsv |
| Adult Autism Spectrum Quotient – short version | 160                           | questionnaires.tsv; WAND_SUBSCALE_SCORES.tsv |
| Visual discomfort images                       | 160                           | questionnaires.tsv; WAND_SUBSCALE_SCORES.tsv |
| Adolescent/Adult Sensory Profile               | 160                           | questionnaires.tsv; WAND_SUBSCALE_SCORES.tsv |
| Migraine Screening Questionnaire               | 160                           | questionnaires.tsv; WAND_SUBSCALE_SCORES.tsv |

Table S5. Summary statistics for questionnaire data included in the Welsh Advanced Neuroimaging Database.

| Trait questionnaire                              | Subscale                    | Mean    | Std     | Min  | Max   | Cronbach's Alpha |
|--------------------------------------------------|-----------------------------|---------|---------|------|-------|------------------|
| <b>Anxiety Depression Distress Inventory</b>     | General distress            | 15.69   | 6.23    | 9    | 39    | 0.92             |
|                                                  | Positive affect             | 27.98   | 6.55    | 11   | 45    | 0.89             |
|                                                  | Somatic anxiety             | 11.2    | 3.02    | 9    | 24    | 0.75             |
| <b>Adult Autism Spectrum Quotient</b>            | Social skills               | 13.59   | 4.44    | 7    | 28    | 0.85             |
|                                                  | Routine                     | 8.84    | 2.26    | 4    | 14    | 0.58             |
|                                                  | Switching                   | 9.07    | 2.26    | 4    | 16    | 0.61             |
|                                                  | Imagination                 | 15.77   | 3.59    | 8    | 26    | 0.67             |
|                                                  | Numbers and patterns        | 10.74   | 3.13    | 5    | 20    | 0.69             |
| <b>Adolescent/Adult Sensory Profile</b>          | Low registration            | 30.81   | 6.69    | 17   | 48    | 0.75             |
|                                                  | Sensation seeking           | 49.29   | 6.26    | 33   | 67    | 0.58             |
|                                                  | Sensory sensitivity         | 34.67   | 7.64    | 20   | 58    | 0.72             |
|                                                  | Sensory avoiding            | 33.8    | 7.82    | 19   | 60    | 0.77             |
| <b>Big Five Inventory</b>                        | Extraversion                | 3.37    | 0.8     | 1.17 | 5     | 0.76             |
|                                                  | Agreeableness               | 4.05    | 0.72    | 1.33 | 5     | 0.78             |
|                                                  | Conscientiousness           | 3.71    | 0.73    | 2    | 5     | 0.74             |
|                                                  | Negative emotionality       | 2.37    | 0.91    | 1    | 4.83  | 0.85             |
|                                                  | Openness                    | 3.79    | 0.71    | 1.67 | 5     | 0.71             |
| <b>Emotion Regulation Questionnaire</b>          | Reappraisal                 | 4.99    | 1.08    | 2.17 | 7     | 0.87             |
|                                                  | Suppression                 | 3.58    | 1.26    | 1    | 6.75  | 0.75             |
| <b>Fazio Laterality Inventory</b>                | Total                       | 79.59   | 17.27   | 2    | 100   | 0.91             |
| <b>Generalized Anxiety Disorder 7-item scale</b> | Total                       | 2.94    | 3.02    | 0    | 16    | 0.81             |
| <b>Global Physical Activity Questionnaire</b>    | Total metabolic equivalents | 4123.42 | 3964.66 | 0    | 20880 | -                |
| <b>Hospital Anxiety and Depression Scale</b>     | Anxiety                     | 5.22    | 3.66    | 0    | 15    | 0.82             |
|                                                  | Depression                  | 2.67    | 2.72    | 0    | 15    | 0.75             |

|                                               |                       |       |       |      |      |      |
|-----------------------------------------------|-----------------------|-------|-------|------|------|------|
| <b>Migraine Screening Questionnaire</b>       | Total                 | 0.82  | 0.98  | 0    | 5    | 0.52 |
| <b>Mind Wandering Questionnaire</b>           | Total                 | 3.61  | 0.91  | 1.4  | 6    | 0.82 |
| <b>Navigational Strategies Questionnaire</b>  | Map total             | 4.96  | 2.73  | 0    | 12   | -    |
|                                               | Non map total         | 5.24  | 2.5   | 0    | 12   | -    |
|                                               | Map preference        | -0.28 | 4.96  | -11  | 12   | -    |
| <b>Survey of Autobiographical Memory</b>      | Episodic              | 3.3   | 0.76  | 1.12 | 5    | 0.82 |
|                                               | Factual               | 3.28  | 0.75  | 1.33 | 5    | 0.7  |
|                                               | Spatial               | 3.68  | 0.75  | 1.67 | 5    | 0.75 |
|                                               | Future                | 3.78  | 0.68  | 1    | 5    | 0.78 |
| <b>Single Item Need to Belong Scale</b>       | Total                 | 3.38  | 1.18  | 1    | 5    | -    |
| <b>Schizotypal Personality Questionnaire</b>  | Total                 | 12.43 | 10.39 | 0    | 53   | 0.93 |
|                                               | Ideas reference       | 1.15  | 1.78  | 0    | 8    | 0.78 |
|                                               | Social anxiety        | 2.61  | 2.43  | 0    | 8    | 0.83 |
|                                               | Odd beliefs           | 0.3   | 0.81  | 0    | 6    | 0.67 |
|                                               | Perceptual            | 0.74  | 1.34  | 0    | 9    | 0.71 |
|                                               | Odd behaviour         | 1.09  | 1.73  | 0    | 6    | 0.83 |
|                                               | No friends            | 1.82  | 2.18  | 0    | 9    | 0.81 |
|                                               | Odd speech            | 2.1   | 2.05  | 0    | 9    | 0.74 |
|                                               | Affect                | 1.39  | 1.7   | 0    | 8    | 0.74 |
| Suspiciousness                                | 1.23                  | 1.72  | 0     | 8    | 0.77 |      |
| <b>Short UPPS-P Impulsive Behaviour Scale</b> | Negative urgency      | 2.02  | 0.62  | 1    | 4    | 0.73 |
|                                               | Lack of perseverance  | 1.76  | 0.44  | 1    | 3.25 | 0.66 |
|                                               | Lack of premeditation | 1.74  | 0.47  | 1    | 3    | 0.77 |
|                                               | Sensation seeking     | 2.76  | 0.67  | 1.25 | 4    | 0.66 |
|                                               | Positive Urgency      | 1.64  | 0.51  | 1    | 3.75 | 0.75 |
| <b>Visual discomfort images</b>               | Low                   | 0.76  | 0.95  | 0    | 5.9  | 0.81 |
|                                               | High                  | 1.72  | 1.76  | 0    | 8    | 0.93 |

---

|                                      |          |      |      |   |       |      |
|--------------------------------------|----------|------|------|---|-------|------|
| <b>Visual Vertigo analogue Scale</b> | Severity | 6.11 | 8.98 | 0 | 47.78 | 0.82 |
|--------------------------------------|----------|------|------|---|-------|------|

---

*Note:* N=160 except for the GPAQ, where N=146. Some participants gave ambiguous responses to questions asking in HH:MM how much time was spent on physical activity per day (e.g. "7"). Data for participants which were judged to be ambiguous were not included in these statistics. We recommend that those interested in the GPAQ re-evaluate the raw data and inclusions/exclusions.

Table S6. Summary statistics for cognitive tasks included in the Welsh Advanced Neuroimaging Database.

| <b>Task</b>           | <b>Subscale</b>             | <b>Mean</b> | <b>Std</b> | <b>Min</b> | <b>Max</b> | <b>Split-half reliability</b> |
|-----------------------|-----------------------------|-------------|------------|------------|------------|-------------------------------|
| <b>Two choice RT</b>  | Accuracy                    | 94.7        | 7.2        | 10.5       | 99.8       | 0.98                          |
|                       | Mean RT                     | 445         | 56         | 330        | 743        | 0.99                          |
| <b>Four choice RT</b> | Accuracy                    | 94.6        | 3.4        | 83.3       | 100.0      | 0.89                          |
|                       | Mean RT                     | 381         | 73         | 265        | 922        | 1.00                          |
| <b>BART</b>           | Mean adjusted pumps         | 33.7        | 14.1       | 9.6        | 76.9       | 0.97                          |
| <b>Logical memory</b> | Story B immediate recall    | 15.0        | 4.0        | 2.0        | 23.0       | -                             |
|                       | Story C immediate recall    | 12.3        | 3.5        | 4.0        | 22.0       | -                             |
|                       | Story B delayed recall      | 12.7        | 4.4        | 0.0        | 22.0       | -                             |
|                       | Story C delayed recall      | 11.1        | 3.7        | 1.0        | 22.0       | -                             |
|                       | Story B delayed recognition | 12.9        | 2.1        | 0.0        | 22.0       | -                             |
|                       | Story C delayed recognition | 12.3        | 2.0        | 0.0        | 15.0       | -                             |
| <b>WASI II</b>        | Vocabulary (raw)            | 39.8        | 5.1        | 27.0       | 52.0       | -                             |
|                       | Matrix Reasoning (raw)      | 19.7        | 3.5        | 4.0        | 26.0       | -                             |
| <b>Verbal fluency</b> | Phonemic (f words)          | 16.1        | 4.8        | 5.0        | 31.0       | -                             |
|                       | Semantic (animals)          | 24.8        | 6.5        | 10.0       | 43.0       | -                             |
|                       | Social (friends' names)     | 22.5        | 6.6        | 9.0        | 43.0       | -                             |
|                       | Spatial (bedroom objects)   | 23.0        | 5.6        | 9.0        | 39.0       | -                             |

Note. Split-half reliability coefficients are calculated from odd and even trials with Spearman-Brown correction applied
